# Supplementary material
Source: PubMed Central journal article supplement (PMC7212651)
Supplement: supp_RA119.012026_157305_1_supp_504161_q85vtd.pdf [file supp_RA119.012026_157305_1_supp_504161_q85vtd.pdf]

## **Supporting Information**

Phosphoproteomic characterization of the signaling network resulting from activation of the chemokine receptor CCR2

**Cheng Huang<sup>1,2,7</sup>, Simon R. Foster<sup>1,7</sup>, Anup D. Shah<sup>1,2,3</sup>, Oded Kleifeld<sup>4</sup>, Meritxell Canals<sup>5,6</sup>, Ralf B. Schittenhelm<sup>1,2,8</sup>, and Martin J. Stone<sup>1,8\*</sup>**

From the <sup>1</sup>Infection and Immunity Program and Department of Biochemistry and Molecular Biology, Biomedicine Discovery Institute, Monash University, Clayton 3800, Victoria, Australia; <sup>2</sup>Monash Proteomics & Metabolomics Facility, Monash Biomedicine Discovery Institute, Monash University, Clayton 3800, Victoria, Australia; <sup>3</sup>Monash Bioinformatics Platform, Monash Biomedicine Discovery Institute, Monash University, Clayton 3800, Victoria, Australia; <sup>4</sup>Faculty of Biology, Technion-Israel Institute of Technology, Technion City, Haifa, Israel; <sup>5</sup>Division of Physiology, Pharmacology and Neuroscience, School of Life Sciences, Queen's Medical Centre, University of Nottingham, Nottingham NG7 2UH, United Kingdom; <sup>6</sup>Centre of Membrane Protein and Receptors, Universities of Birmingham and Nottingham, The Midlands, United Kingdom; <sup>7</sup>Joint first authors; <sup>8</sup>Joint corresponding authors

Figure S1: Coefficient of variation distribution and Pearson correlation of the quantified phosphopeptides (A, C) and proteins (B, D)

Figure S2: Phosphorylation time courses in cells that endogenously express CCR2.

Figure S3: Phosphorylation time course in CCR2-expressing cells for guanine nucleotide exchange factors (GEFs) and GTPase activating proteins (GAPs)

Figure S4: Phosphorylation time course in CCR2-expressing cells for nuclear-related proteins.

Figure S5: A schematic diagram of DIA injection windows for proteome quantification (top panel) and phosphoproteome quantification (bottom panel)

### **Separate Excel Files**

Table S1: Total quantified proteins and differential expression analysis

Table S2: Total quantified phosphopeptides and differential expression analysis

Table S3: Gene ontology and KEGG pathway analysis

Table S4: Quantified phosphopeptides belonging to actin cytoskeleton, GTPases or NUPs

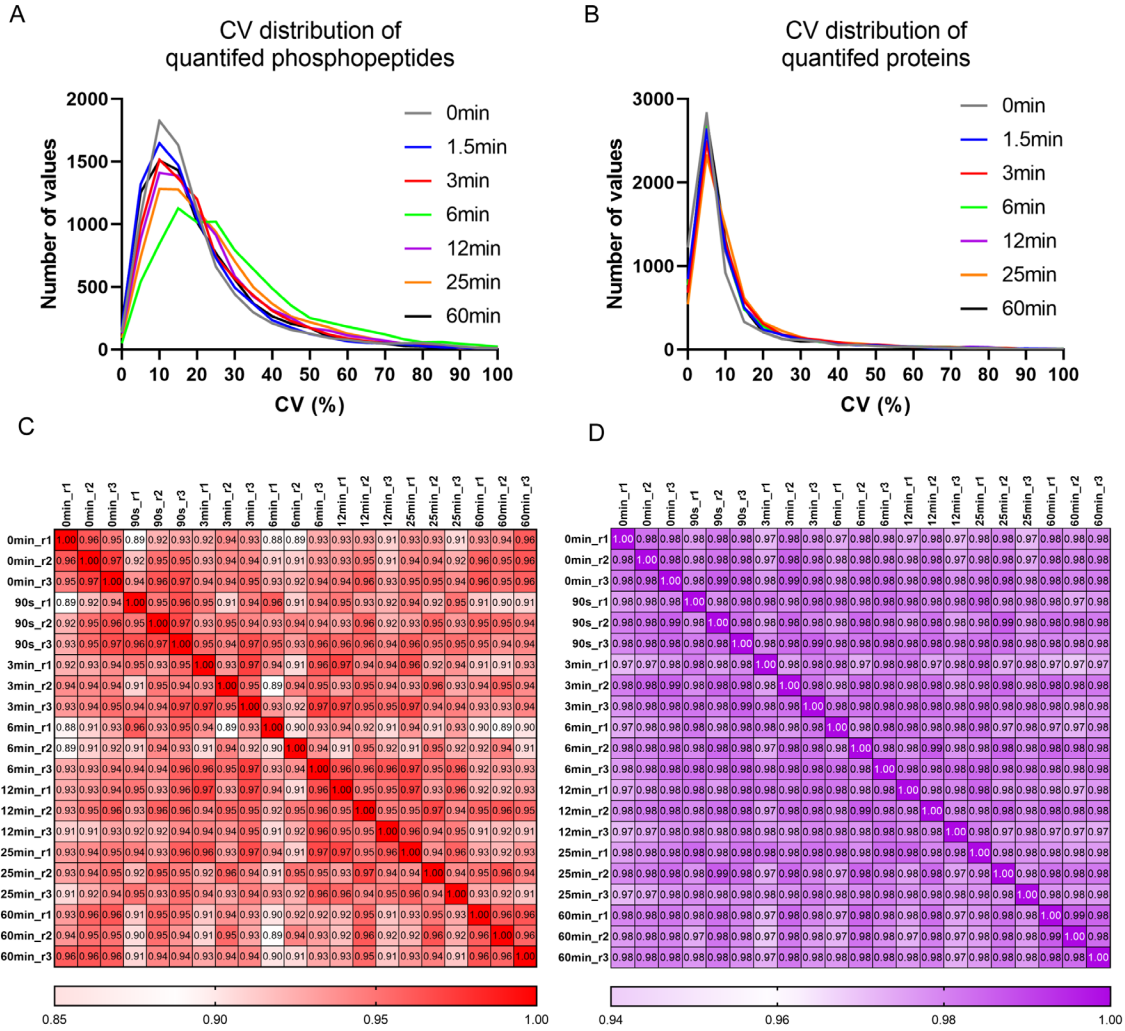

**Figure S1: Coefficients of variation (CV) and Pearson correlations of the quantified phosphopeptides and proteins.** (A,B) The distribution of the coefficients of variation (CVs) is shown for the quantified phosphopeptides (A) and proteins (B) within each time point (n=3). (C,D) These color-coded matrices show the Pearson correlation coefficients, which have been determined for each possible pairwise comparison within the phosphoproteomic (C) and proteomic (D) sample batch.

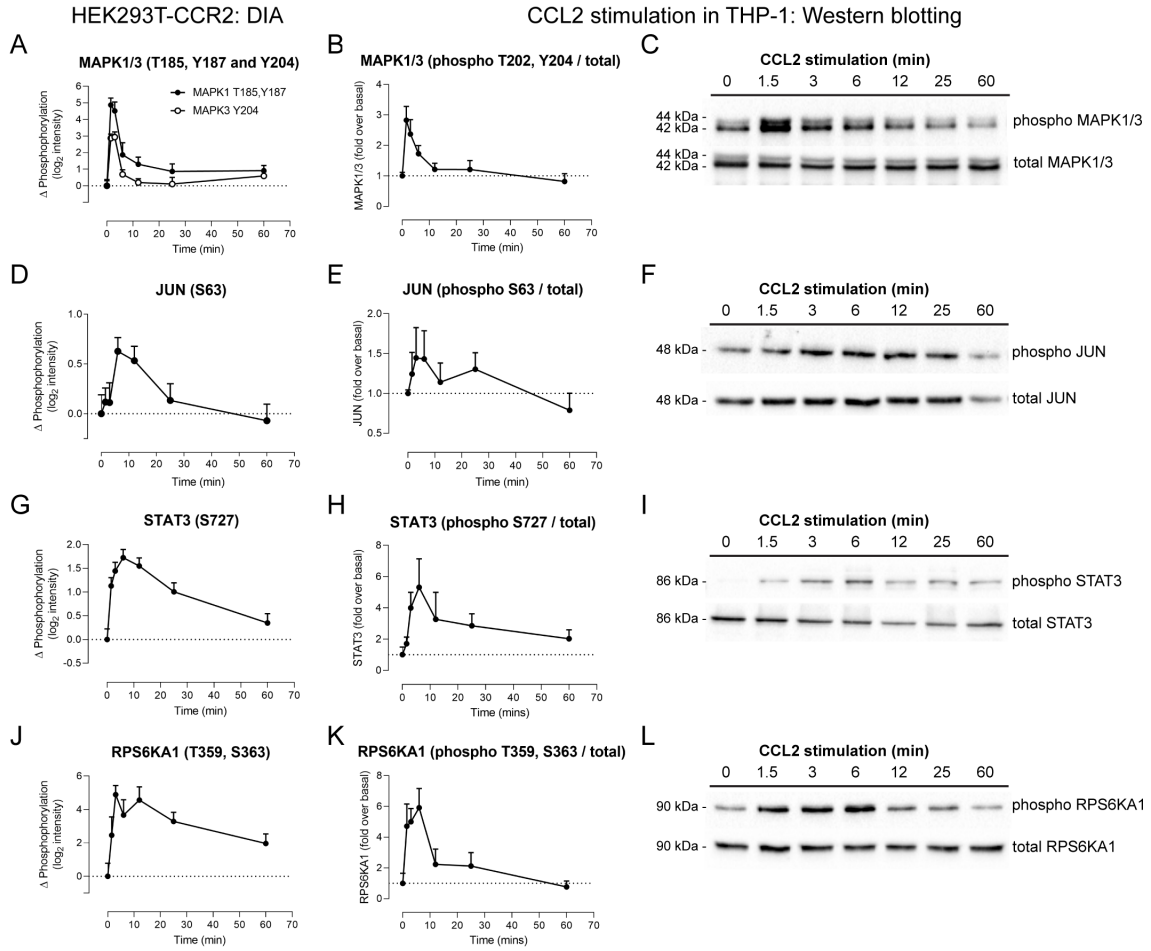

**Figure S2: Phosphorylation time courses in cells that endogenously express CCR2.** Phosphorylation data at the indicated sites are presented for (A-C) MAPK1/3, (B-F) JUN, (G-I) STAT3 and (J-L) RPS6KA1. (A, D, G, J) Phosphorylation time courses in FlpIn-HEK293T-CCR2 cells determined by DIA phosphoproteomics. Data represent CCL2-dependent changes in phosphopeptide intensity relative to unstimulated cells, mean  $\pm$  SEM from 3 biological replicates. (B, E, H, K) Phosphorylation time courses in THP-1 cells determined by Western blotting. Data represent CCL2-dependent changes in phosphoprotein intensity relative to total protein, mean  $\pm$  SEM from 3 biological replicates. (C, F, I, L) Representative Western blots. Molecular weight markers have been cropped out; predicted molecular weights of the proteins are indicated.

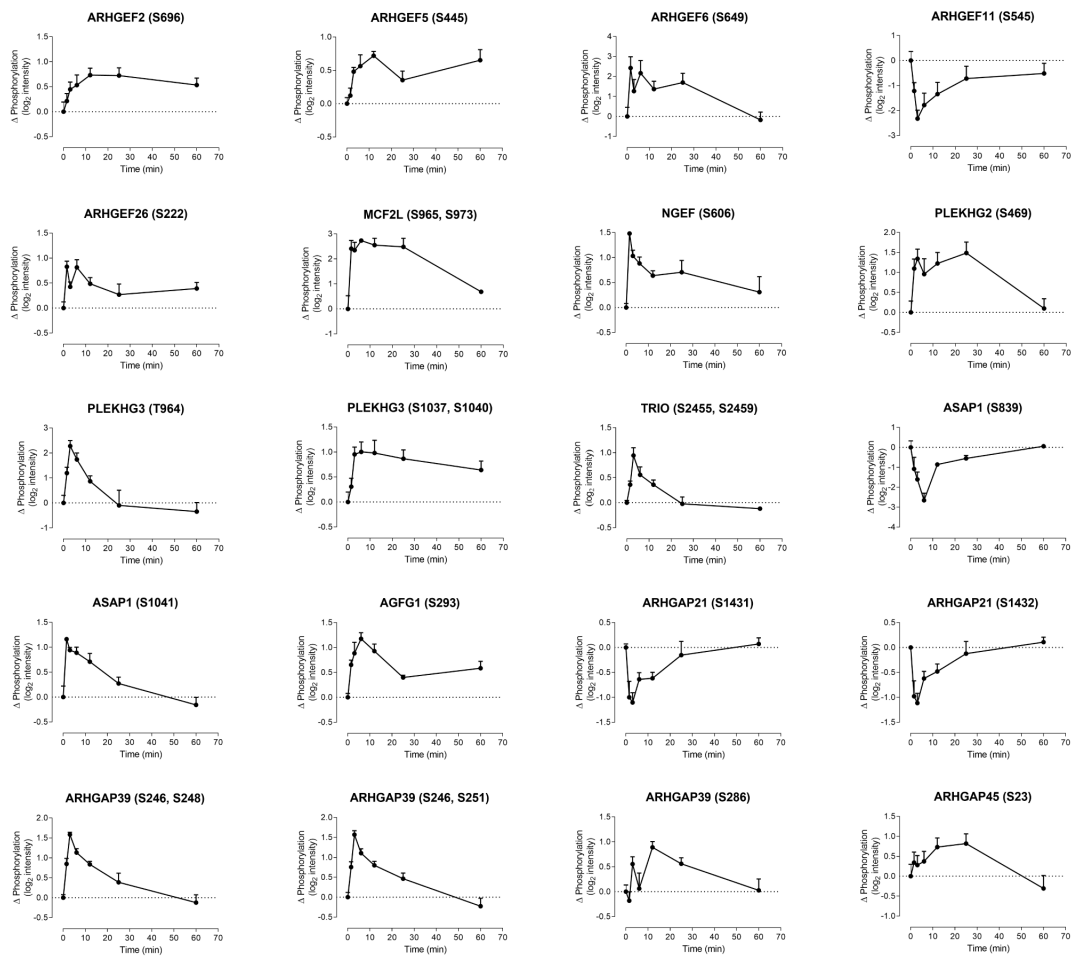

**Figure S3: Phosphorylation time courses in CCR2-expressing cells for a selection of guanine nucleotide exchange factors (GEFs) and GTPase activating proteins (GAPs).** Data represent CCL2-dependent changes in phosphopeptide intensity relative to unstimulated cells, mean  $\pm$  SEM from 3 biological replicates.

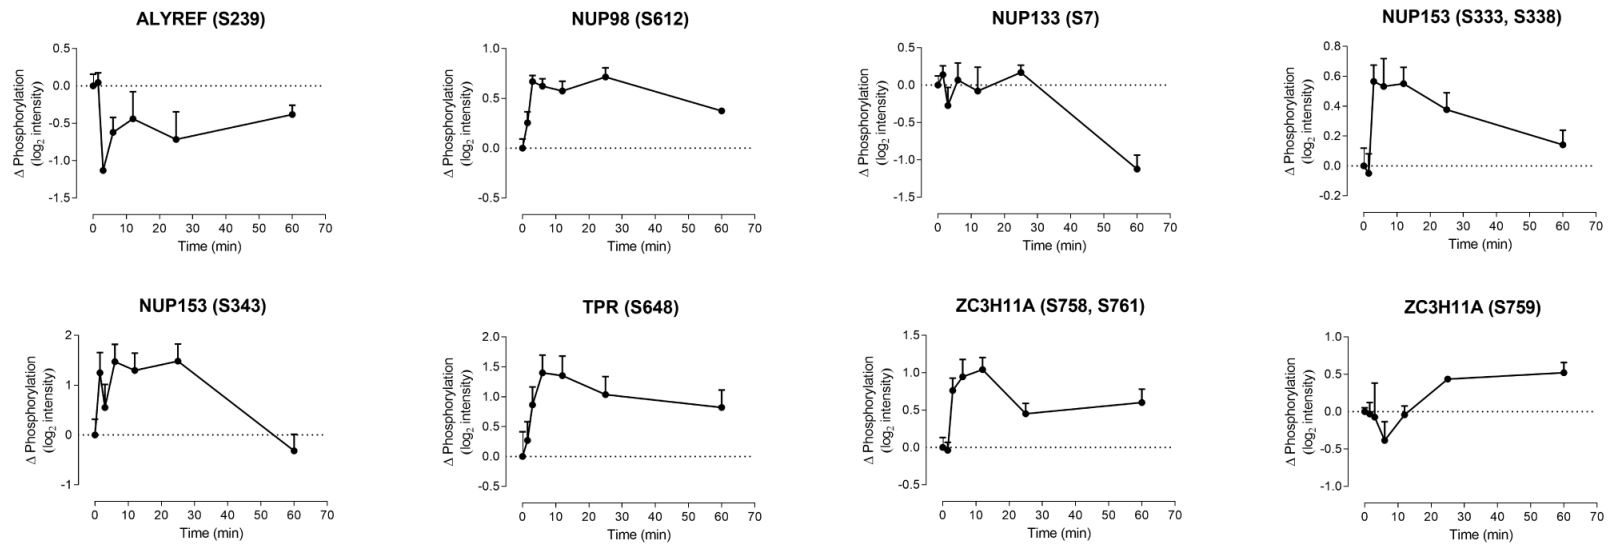

**Figure S4: Phosphorylation time courses in CCR2-expressing cells for a selection of nuclear-related proteins.** Data represent CCL2-dependent changes in phosphopeptide intensity relative to unstimulated cells, mean  $\pm$  SEM from 3 biological replicates.

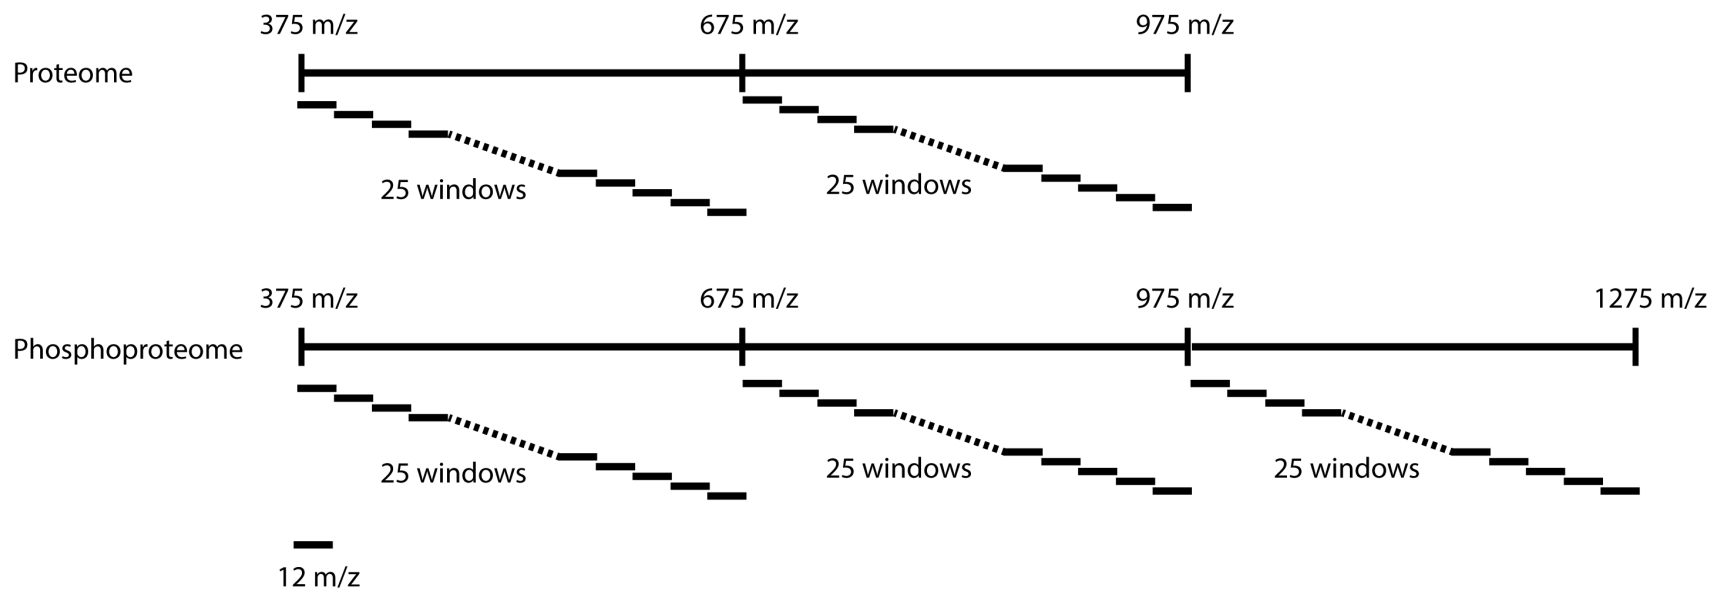

**Figure S5: A schematic illustration of the DIA strategy used for proteome quantification (top panel) and phosphoproteome quantification (bottom panel).** In each DIA run, 25 windows with an isolation width of 12 m/z have been acquired. To cover a m/z range of 375 - 975 m/z for the global proteomic analyses (top panel) and 375 - 1275 m/z for the phosphoproteomic analyses (bottom panel), each proteomic sample was injected twice and each phosphoproteomic sample three times.
